# Supplementary material for: Hydrophobic Starch-Based Films Using Potato Washing Slurries and Spent Frying Oil
Source: MDPI journal article supplement (doi:10.3390/foods10122897), 2021-11-23
Supplement: s1 [file s1]

# Hydrophobic starch-based films using potato washing slurries and spent frying oil

(Supplementary Figure)

Sílvia Petronilho\*, André Oliveira, M. Rosário Domingues, Fernando M. Nunes, Manuel

A. Coimbra, and Idalina Gonçalves,

\* Correspondence: silviapetronilho@ua.pt

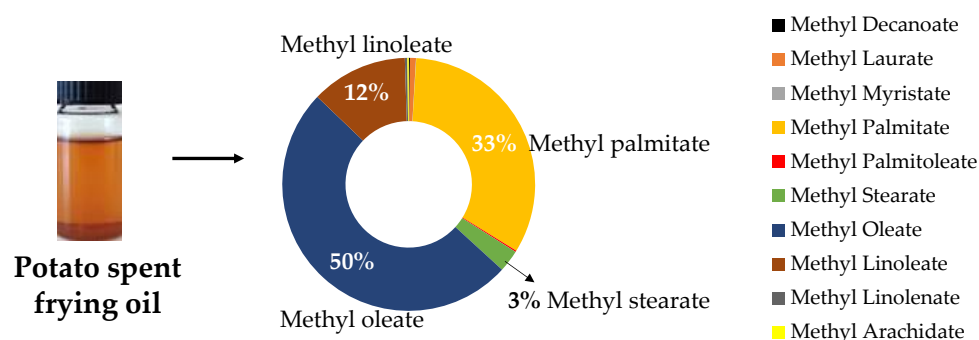

**Figure S1.** Fatty acids composition (determined as FAME) of the spent frying oil recovered from potato chips industry frying residues.
